# Supplementary material
Source: Springer Nature journal article supplement (https://www.springermedizin.de/resource/supplementary/12936_2001_1_MOESM1_ESM.pdf/9541392)
Supplement: MOESM1 [file 9541392]

K1 SGWCFRYMHATGASLVFLLTYLHILRGLNYSYMYLPLSWISGLILFMIFIVTAFVGYVLP 109  
TM93-C1088 SGWCFRYMHATGASLVFLLTYLHILRGLNYSYMYLPLSWISGLILFMIFIVTAFVGYVLP 109  
NGATV01 SGWCFRYMHATGASLVFLLTYLHILRGLNYSYMYLPLSWISGLILFMIFIVTAFVGYVLP 109

K1 WQMSYWGATVITNLLSSIPVAVIWICGGYTVSDPTIKRFFVLHFILPFIGLCIVFIHIF 179  
TM93-C1088 WQMSYWGATVITNLLSSIPVAVIWICGGYTVSDPTIKRFFVLHFILPFIGLCIVFIHIF 179  
NGATV01 WQMSYWGATVITNLLSSIPVAVIWICGGYTVSDPTIKRFFVLHFILPFIGLCIVFIHIF 179

K1 FLHLHGSTNPLGYDTALKIPFYPNLLSLDVKGFNNVILFLIQSLFGIIPLSHPDNAIVV 249  
TM93-C1088 FLHLHGSTNPLGYDTALKIPFYPNLLSLDVKGFNNVILFLIQSLFGIIPLSHPDNAIVV 249  
NGATV01 FLHLHGSTNPLGYDTALKIPFYPNLLSLDVKGFNNVILFLIQSLFGIIPLSHPDNAIVV 249

K1 NTYVTPSQIVPEWYFLPFVAMLKTVPSKPAGLVIVLLSLQLLFLLAEQRSLTTIIQFKMI 309  
TM93-C1088 NTYVTPSQIVPEWYFLPFSAMLKTVPSKPAGLVIVLLSLQLLFLLAEQRSLTTIIQFKMI 309  
NGATV01 NTYVTPSQIVPEWYFLPFVAMLKTVPSKPAGLVIVLLSLQLLFLLAEQRSLTTIIQFKMI 309

K1 FGARD 314  
TM93-C1088 FGARD 314  
NGATV01 FGARD 314
